# Supplementary material for: Surface-Fabrication of Fluorescent Hydroxyapatite for Cancer Cell Imaging and Bio-Printing Applications
Source: MDPI journal article supplement (doi:10.3390/bios12060419), 2022-06-15
Supplement: s1 [file s1]

Supplementary

# Surface-Fabrication of Fluorescent Hydroxyapatite for Cancer Cell Imaging and Bio-Printing Applications

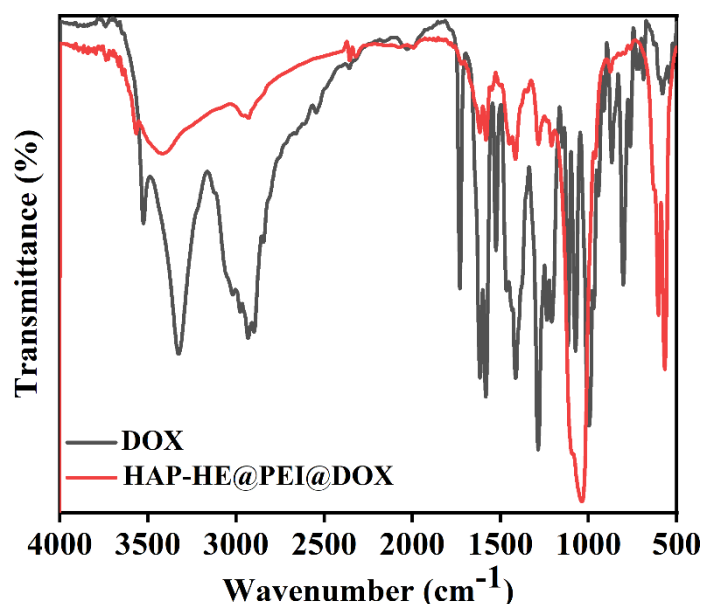

Figure S1. Normalized FT-IR spectra of DOX and HAP-HE@PEI@DOX samples.

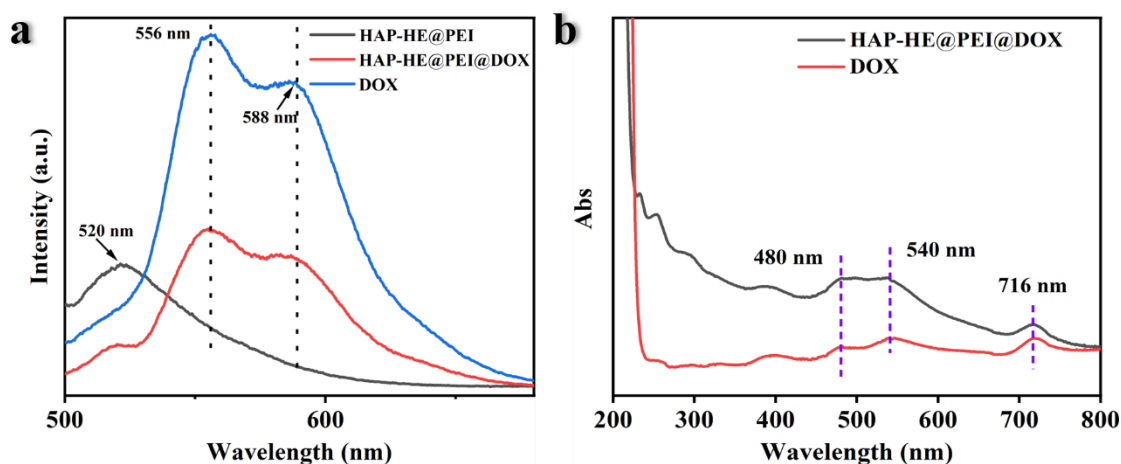

Figure S2. Fluorescence and UV-vis spectra of HAP-HE@PEI@DOX and DOX. (a) FL Spectrum (Excitation wavelength: 480 nm); (b) UV-Vis Spectrum.

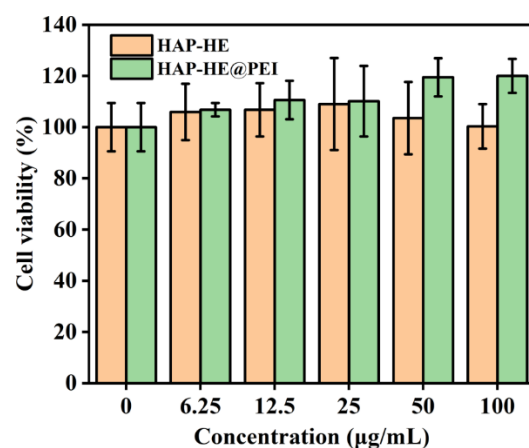

**Figure S3.** Determination of cell viability of HAP-HE, HAP-HE@PEI with equal concentration gradient. The cell survival viability of A549 cells co-incubated with gradient mass concentration of HAP-HE and HAP-HE@PEI for 24 h.

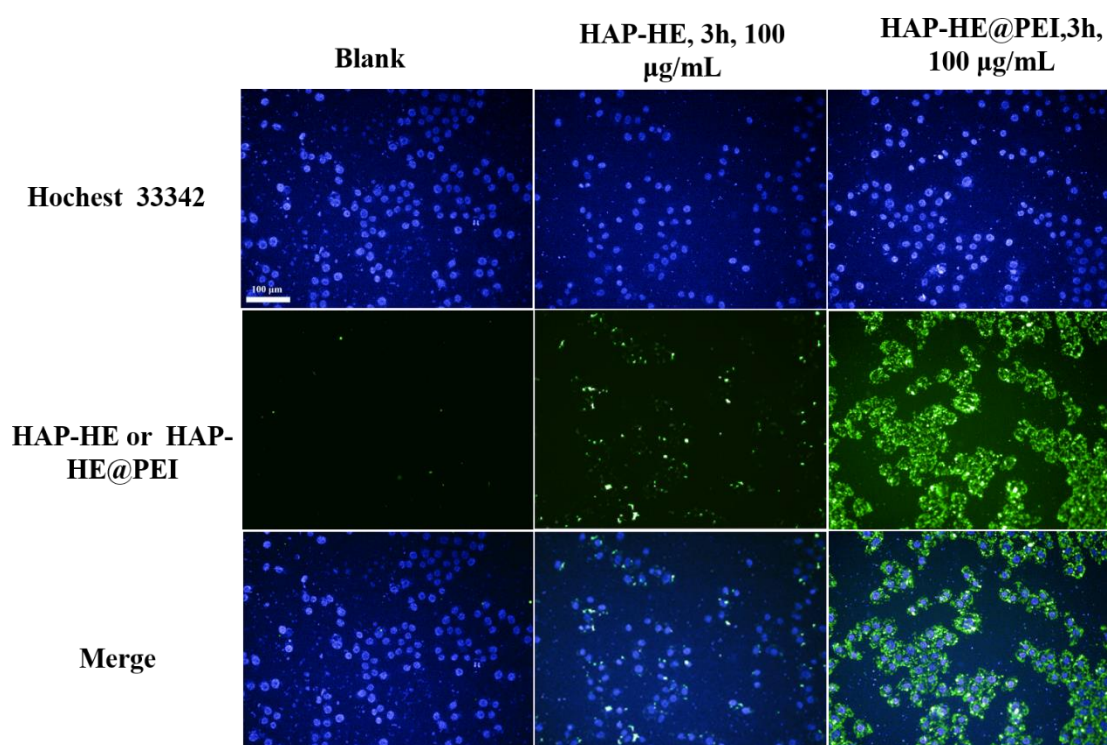

**Figure S4.** High-content imaging images of A549 cells co-incubated with 100 µg/mL of HAP-HE for 3h (HAP-HE@PEI: Ex= 440 nm, Em= 520 nm; Hochest 33342 for nucleus: Ex= 346 nm, Em= 460 nm).

**Table S1.** The percentage of each element of HAP, HAP-HE and HAP-HE@PEI.

|            | C (%) | N (%) | O (%) | P (%) | Ca (%) |
|------------|-------|-------|-------|-------|--------|
| HAP        | 15.78 | 4.45  | 50.67 | 12.84 | 16.26  |
| HAP-HE     | 18.18 | 6.10  | 48.29 | 12.13 | 15.30  |
| HAP-HE@PEI | 51.67 | 18.18 | 19.35 | 5.21  | 5.28   |
